# Supplementary material for: Natural Killer Cell Subpopulations and Inhibitory Receptor Dynamics in Myelodysplastic Syndromes and Acute Myeloid Leukemia
Source: PubMed Central journal article supplement (PMC8112610; doi:10.3389/fimmu.2021.665541), 2021-04-27
Supplement: DataSheet_1.pdf [file DataSheet_1.pdf]

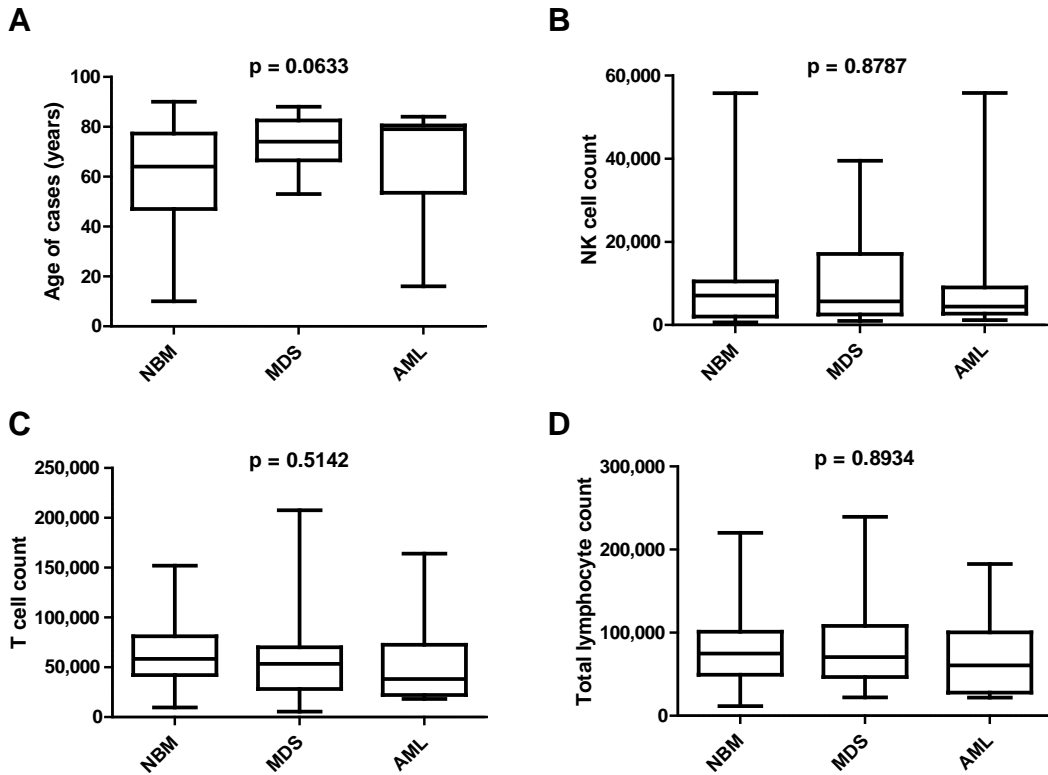

**Supplementary Figure 1. Comparison of age and bone marrow cell counts for the three groups of cases analysed in this study: NBM, MDS, and AML.**

**(A)** Age data presented as box and whisker plots for normal bone marrow (NBM), myelodysplastic syndromes (MDS), and acute myeloid leukemias (AML) cases.

**(B)** NK cell count data presented as box and whisker plots for normal bone marrow (NBM), myelodysplastic syndromes (MDS), and acute myeloid leukemias (AML) cases.

**(C)** T cell count data presented as box and whisker plots for normal bone marrow (NBM), myelodysplastic syndromes (MDS), and acute myeloid leukemias (AML) cases.

**(D)** Total lymphocyte count data presented as box and whisker plots for normal bone marrow (NBM), myelodysplastic syndromes (MDS), and acute myeloid leukemias (AML) cases.

Statistical calculations of significance were performed using the Kruskal-Wallis and Dunn's Multiple Comparison test with significance set for  $P < 0.05$ .

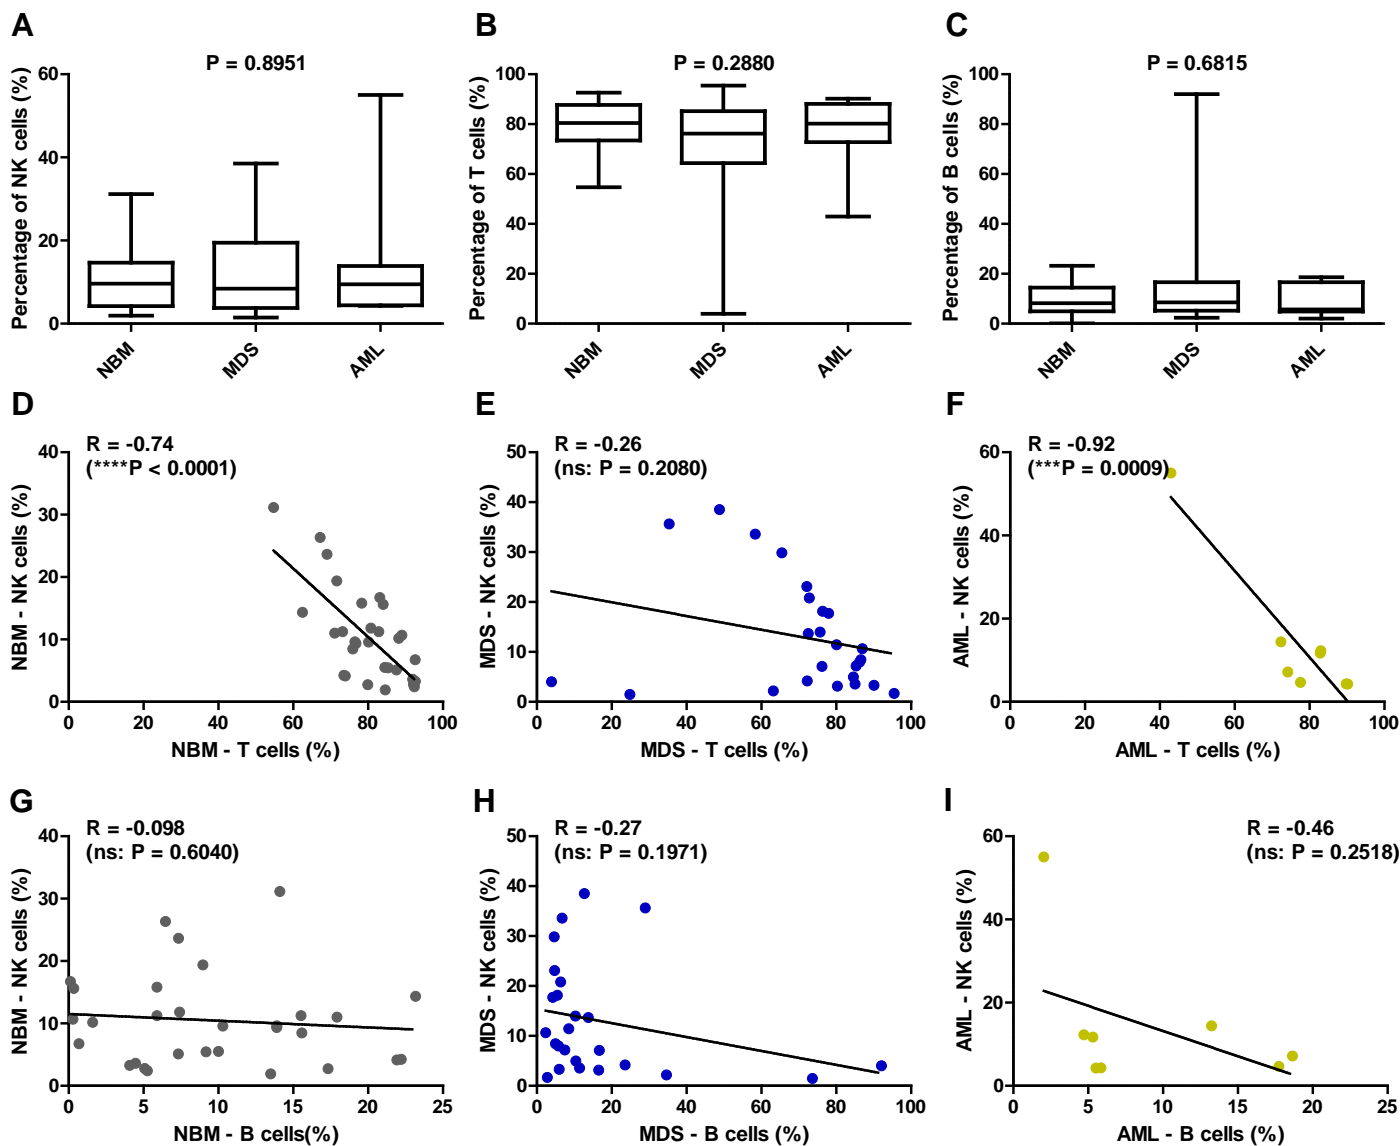

**Supplementary Figure 2. Correlations between NK, T, and B cell percentages from the bone marrow microenvironment of NBM, MDS and AML cases.**

**(A)** NK cell percentage data presented as box and whisker plots for normal bone marrow (NBM), myelodysplastic syndromes (MDS), and acute myeloid leukemias (AML) cases.

**(B)** T cell percentage data presented as box and whisker plots for normal bone marrow (NBM), myelodysplastic syndromes (MDS), and acute myeloid leukemias (AML) cases.

**(C)** B cell percentage data presented as box and whisker plots for normal bone marrow (NBM), myelodysplastic syndromes (MDS), and acute myeloid leukemias (AML) cases.

**(A-C)** Statistical calculations of significance were performed using the Kruskal-Wallis and Dunn's Multiple Comparison test with significance set for  $P < 0.05$ .

**(D-I)** Correlation coefficients ( $R$ ) were computed for **(D)** NK and T cell percentages in NBM cases ( $n = 30$ ); **(E)** NK and T cell percentages in MDS ( $n = 25$ ); **(F)** NK and T cell percentages in AML ( $n = 8$ ); **(G)** NK and B cell percentages in NBM cases ( $n = 30$ ); **(H)** NK and B cell percentages in MDS ( $n = 25$ ); **(I)** NK and B cell percentages in AML ( $n = 8$ ).

Data are presented as scatter plots. Spearman test was used to analyse the significance of the identified correlations ( $****P < 0.0001$ ,  $***P < 0.001$ , ns – not significant)

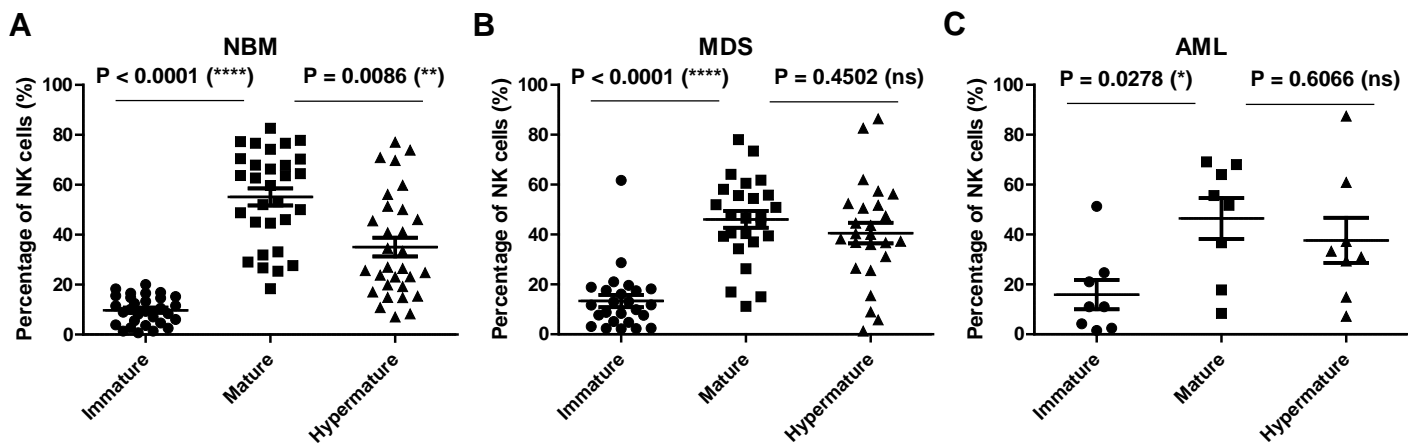

**Supplementary Figure 3. Distribution of NK maturation subsets within the bone marrow microenvironment of NBM, MDS, and AML cases.**

Percentages of bone marrow CD56<sup>bright</sup>CD94<sup>hi</sup>CD16<sup>-</sup>CD57<sup>-</sup> immature, CD56<sup>dim</sup>CD94<sup>med</sup>CD16<sup>+</sup>CD57<sup>-</sup> mature, and CD56<sup>dim</sup>CD94<sup>low</sup>CD16<sup>+</sup>CD57<sup>+</sup> hypermature NK cells in (A) normal bone marrow (NBM, n = 30), (B) myelodysplastic syndromes (MDS, n = 25), and (C) acute myeloid leukemias (AML, n = 8) cases. Data are presented as scatter dot plots, and the lines represent the mean ± SEM (\*\*\*\*P < 0.0001, \*\*P < 0.01, \*P < 0.05, ns – not significant; two-tailed paired t-test was applied for all cases with the exception of comparing the means of immature and mature MDS cases, when the Wilcoxon signed rank test was used).

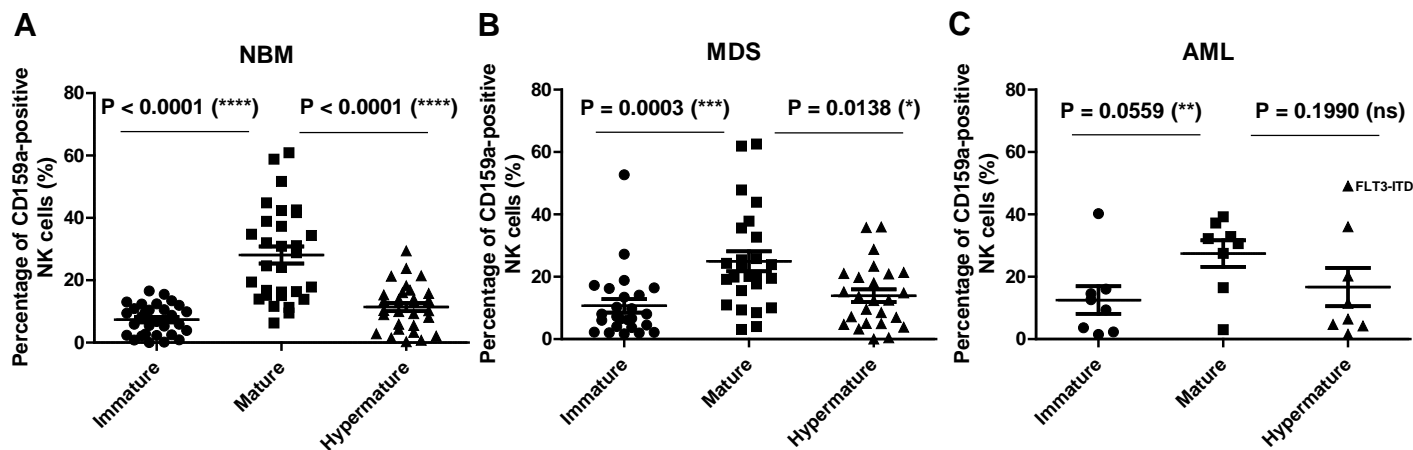

**Supplementary Figure 4. Distribution of CD159a-positive NK maturation subsets within the bone marrow microenvironment of NBM, MDS, and AML cases.**

Percentages of bone marrow CD56<sup>bright</sup>CD94<sup>hi</sup>CD16<sup>-</sup>CD57<sup>-</sup> immature, CD56<sup>dim</sup>CD94<sup>med</sup>CD16<sup>+</sup>CD57<sup>-</sup> mature, and CD56<sup>dim</sup>CD94<sup>low</sup>CD16<sup>+</sup>CD57<sup>+</sup> hypermature CD159a-positive NK cells in **(A)** normal bone marrow (NBM, n = 30), **(B)** myelodysplastic syndromes (MDS, n = 25), and **(C)** acute myeloid leukemias (AML, n = 8) cases. Data are presented as scatter dot plots, and the lines represent the mean  $\pm$  SEM (\*\*\*\*P < 0.0001, \*\*\*P < 0.001, \*\*P < 0.01, \*P < 0.05, ns – not significant; two-tailed paired t-test was applied for all cases with the exception of comparing the means of immature and mature MDS cases, when the Wilcoxon signed rank test was used).

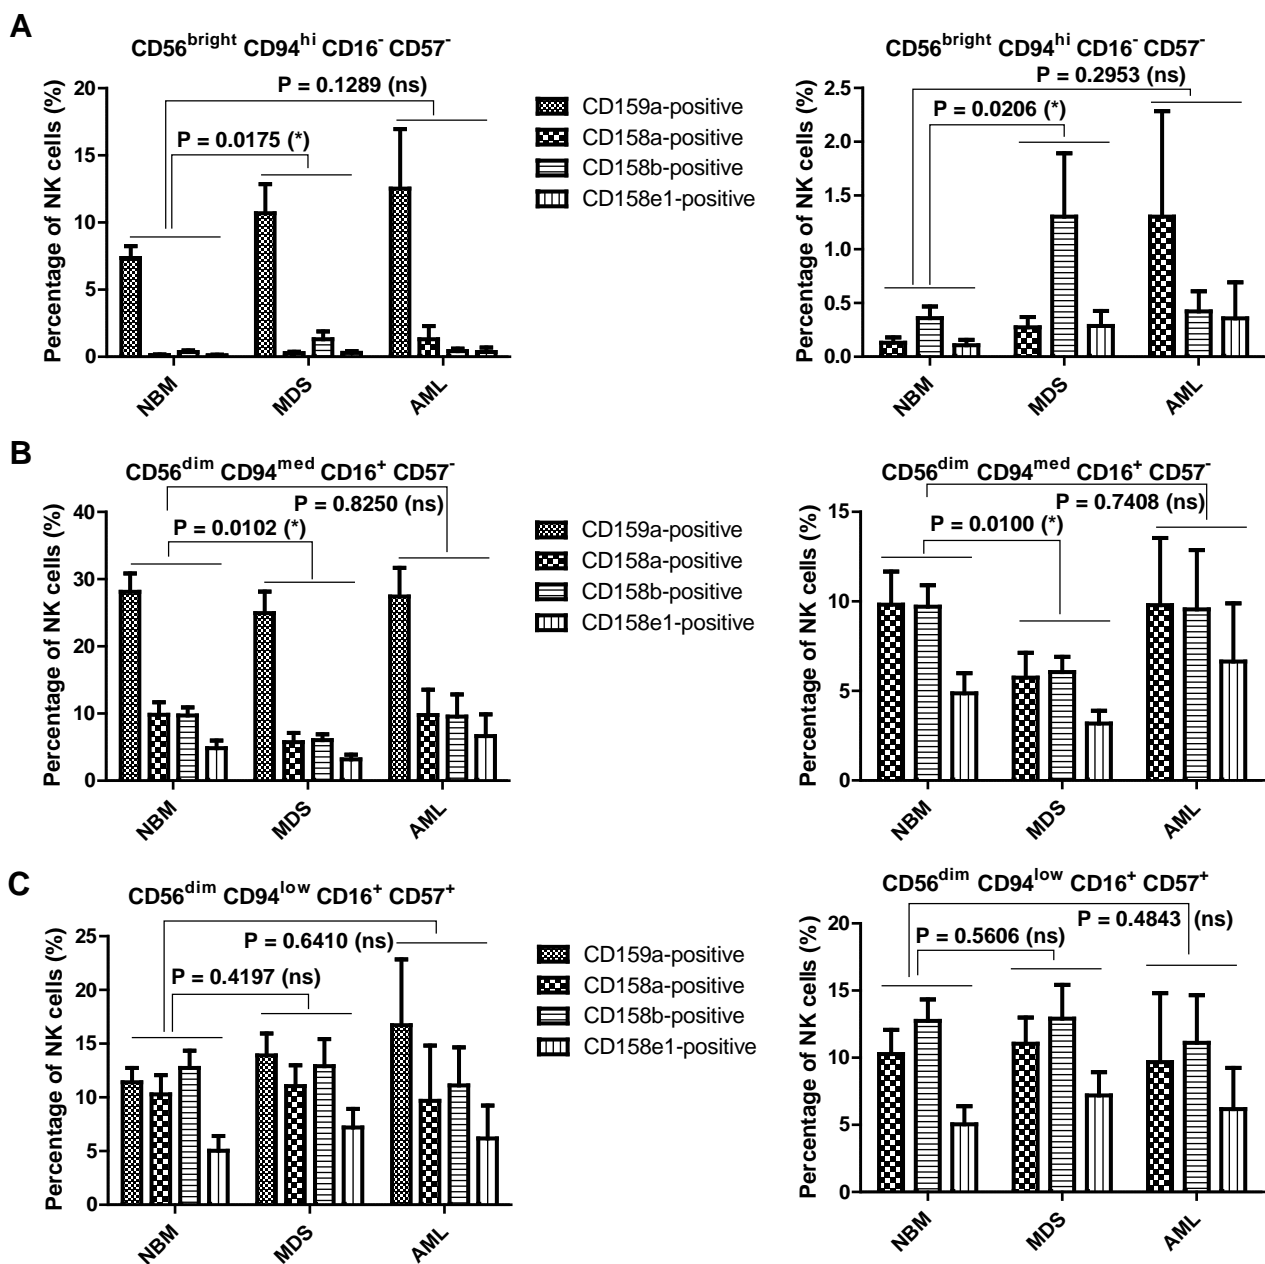

**Supplementary Figure 5. Differences in the repartition of NK maturation subsets within the bone marrow microenvironment of NBM, MDS, and AML cases.**

Percentage of bone marrow (A) CD56<sup>bright</sup>CD94<sup>hi</sup>CD16<sup>-</sup>CD57<sup>-</sup> immature NK cells, (B) CD56<sup>dim</sup>CD94<sup>med</sup>CD16<sup>+</sup>CD57<sup>-</sup> mature NK cells, (C) CD56<sup>dim</sup>CD94<sup>low</sup>CD16<sup>+</sup>CD57<sup>+</sup> hypermature NK cells expressing CD159a (left panel only) and KIR receptors (both panels) in NBM (n = 30), MDS (n = 25), and AML (n = 8) cases. Bars represent the mean ± SEM (\*P < 0.05; two-way ANOVA on ranks followed by Bonferroni post-test).

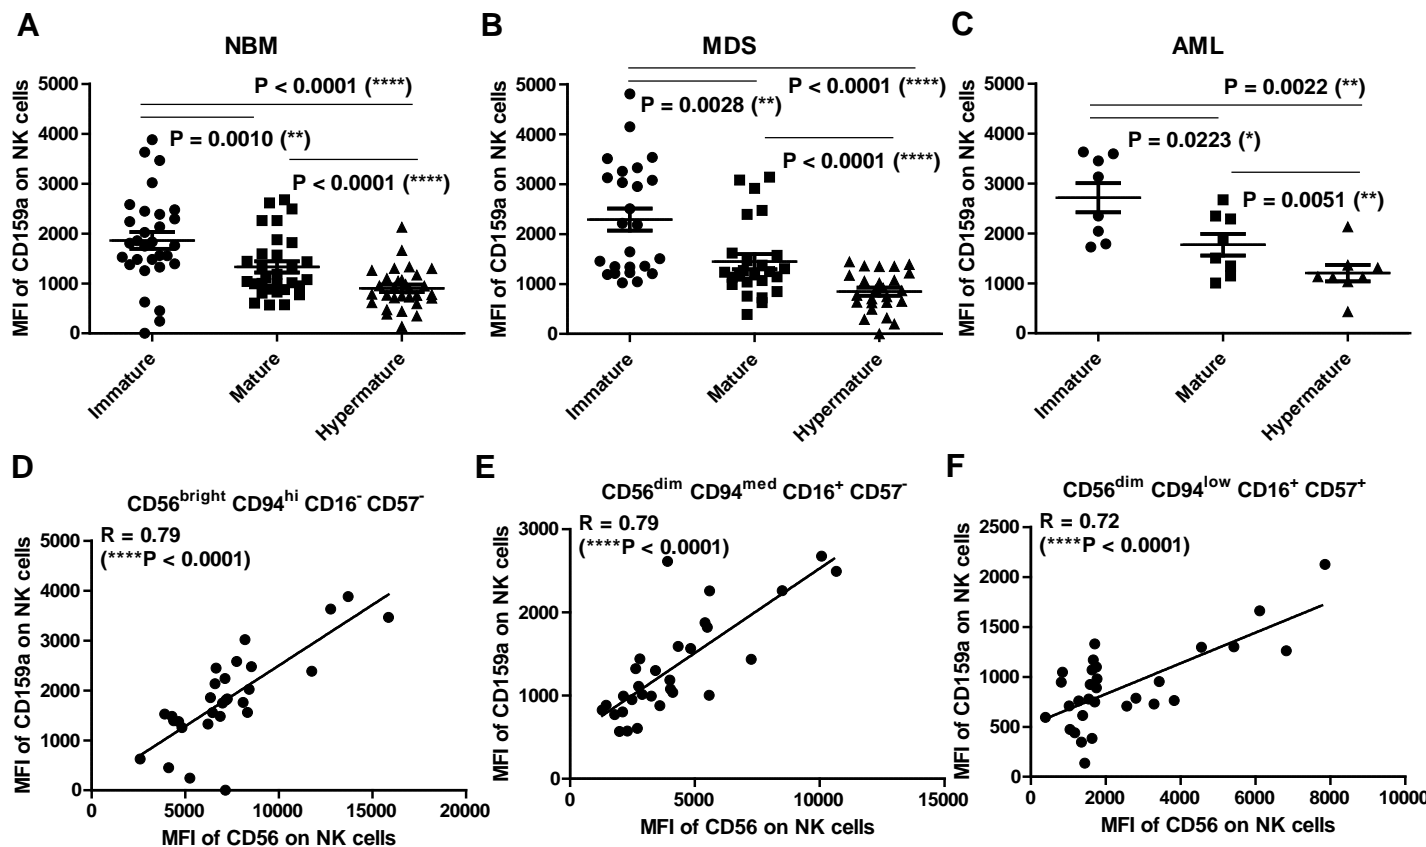

**Supplementary Figure 6. CD159a MFI of distinct NK maturation subsets within the bone marrow microenvironment of NBM, MDS, and AML cases.**

(A-C) Mean fluorescence intensity (MFI) of CD159a on bone marrow  $CD56^{bright}CD94^{hi}CD16^{-}CD57^{-}$  immature,  $CD56^{dim}CD94^{med}CD16^{+}CD57^{-}$  mature, and  $CD56^{dim}CD94^{low}CD16^{+}CD57^{+}$  hypermature CD159a-positive NK cells in (A) normal bone marrow (NBM,  $n = 30$ ), (B) myelodysplastic syndromes (MDS,  $n = 25$ ), and (C) acute myeloid leukemias (AML,  $n = 8$ ) cases. Data are presented as scatter dot plots, and the lines represent the mean  $\pm$  SEM (\*\*\*\* $P < 0.0001$ , \*\* $P < 0.01$ , \* $P < 0.05$ , ns – not significant; two-tailed paired t-test).

(D-F) Correlation of CD159a and CD56 MFI values ( $R$ ) in NBM ( $n = 30$ ) for each bone marrow NK maturation subset: (D)  $CD56^{bright}CD94^{hi}CD16^{-}CD57^{-}$  immature, (E)  $CD56^{dim}CD94^{med}CD16^{+}CD57^{-}$  mature, and (F)  $CD56^{dim}CD94^{low}CD16^{+}CD57^{+}$  hypermature (\*\*\*\* $P < 0.0001$ , F-test).

**Table S1. Patients' characteristics**

| Characteristic                                 | Control group                       | MDS                                 | AML                                  |
|------------------------------------------------|-------------------------------------|-------------------------------------|--------------------------------------|
| <b>Patients no.</b>                            | 30                                  | 25                                  | 8                                    |
| <b>Age, years<br/>Mean ± SD</b>                | 60 ± 22.6                           | 73.7 ± 9.5                          | 67.2 ± 23.7                          |
| <b>Male</b>                                    | 15 (50%)                            | 17 (68%)                            | 5 (62.5%)                            |
| <b>Female</b>                                  | 15 (50%)                            | 8 (32%)                             | 3 (37.5%)                            |
| <b>Ratio Male/Female</b>                       | 1                                   | 2.1                                 | 1.6                                  |
| <b>Hemoglobin<br/>Mean ± SE</b>                | 11.22 ± 0.44<br>g/dl                | 9.89 ± 0.38<br>g/dl                 | 9.825 ± 0.57<br>g/dl                 |
| <b>Platelets<br/>Mean ± SE</b>                 | 167 ± 15.17<br>x10 <sup>9</sup> /L  | 175.2 ± 24.3<br>x10 <sup>9</sup> /L | 91.75 ± 31.49<br>x10 <sup>9</sup> /L |
| <b>Leucocytes<br/>Mean ± SE</b>                | 4.260 ± 0.33<br>x10 <sup>9</sup> /L | 6.488 ± 1.07<br>x10 <sup>9</sup> /L | 13.51 ± 4.9<br>x10 <sup>9</sup> /L   |
| <b>Lymphocytes<br/>Mean ± SE</b>               | 1.270 ± 0.13<br>x10 <sup>9</sup> /L | 1.983 ± 0.69<br>x10 <sup>9</sup> /L | 2.509 ± 0.91<br>x10 <sup>9</sup> /L  |
| <b>T Lymphocytes<br/>Mean ± SE</b>             | 79.86 ± 1.73<br>x10 <sup>9</sup> /L | 70.27 ± 4.32<br>x10 <sup>9</sup> /L | 76.62 ± 5.34<br>x10 <sup>9</sup> /L  |
| <b>B lymphocytes<br/>Mean ± SE</b>             | 9.65 ± 1.23<br>x10 <sup>9</sup> /L  | 16.6 ± 4.33<br>x10 <sup>9</sup> /L  | 9.13 ± 2.27<br>x10 <sup>9</sup> /L   |
| <b>% of blasts on bone<br/>marrow Mean± SE</b> | 1.97 ± 0.26                         | 4.050 ± 0.71                        | 52.88 ± 9.29                         |

SD, standard deviation; SE, standard error; MDS, Myelodysplastic Syndromes; AML, Acute Myeloid Leukemia

**Table S2. The Myelodysplastic Syndromes patient’s stratification was assigned according to the 2016 WHO Criteria and the Revised International Prognostic Scoring System**

| WHO subtypes (n, %)              | MDS-SLD<br>10 (40%)    | MDS-RS<br>3 (12%)      | MDS-isolated<br>5q deletion 0 | MDS-MD<br>6 (24%)    | MDS-EB<br>5 (20%)   | MDS -<br>Unclassifiable<br>1 (4%) |
|----------------------------------|------------------------|------------------------|-------------------------------|----------------------|---------------------|-----------------------------------|
| IPSS-R risk group (n, %)         | Very low<br>7 (28%)    | Low<br>9 (36%)         | Intermediate<br>5 (20%)       | High<br>3 (12%)      | Very High 1<br>(4%) |                                   |
| IPSS-R prognosis survival (n, %) | 8.8 years<br>4 (16%)   | 5.3 years<br>9 (36%)   | 3 years<br>5 (20%)            | 1.6 years<br>6 (24%) | 0.8 years<br>1 (4%) |                                   |
| IPSS-R AML evolution (n,%)       | Not reached<br>4 (16%) | 10.8 years<br>11 (48%) | 3.2 years<br>5 (20%)          | 1.4 years<br>2 (8%)  | 0.7 years<br>1 (4%) |                                   |

**MDS**, Myelodysplastic Syndrome; **WHO**, World Health Organization, **MDS-SLD**, MDS with single lineage dysplasia; **MDS-RS**, MDS with ringed sideroblasts; **MDS-MD**, MDS with multilineage dysplasia; **MDS-EB**, MDS with excess blasts; **IPSS-R**, Revised International Prognostic Scoring System.



**Table S3. Distribution of NK cells maturation subsets in NBM, MDS and AML groups**

| ME (mean) ± SE (standard error)                      | NBM          | MDS          | AML          |
|------------------------------------------------------|--------------|--------------|--------------|
| % CD56 <sup>hi</sup> CD94 <sup>hi</sup> CD16-CD57-   | 9.7 ± 1.0    | 13.34 ± 2.45 | 15.9 ± 5.86  |
| % CD56 <sup>dim</sup> CD94 <sup>med</sup> CD16+CD57- | 55.13 ± 3.41 | 46.05 ± 3.36 | 46.42 ± 8.2  |
| % CD56 <sup>dim</sup> CD94 <sup>low</sup> CD16+CD57+ | 35.04 ± 3.78 | 40.58 ± 4.13 | 37.65 ± 9.05 |

Normal bone marrow (NBM), myelodysplastic syndromes (MDS), acute myeloid leukemia (AML)

**Table S4. Pearson correlation coefficients (R) between the percentage of NK cells and the parameters required for computing the R-IPSS score in MDS.**

|            |        | Age                   | Hemoglobin            | Platelets             | Neutrophils           | Bone marrow blasts (%) | Cytogenetic risk     |
|------------|--------|-----------------------|-----------------------|-----------------------|-----------------------|------------------------|----------------------|
| <b>NBM</b> | NK (%) | R = 0.1<br>P = 0.59   | R = -0.02<br>P = 0.87 | R = -0.01<br>P = 0.94 | R = -0.05<br>P = 0.79 | N/A                    | N/A                  |
| <b>MDS</b> | NK (%) | R = -0.15<br>P = 0.46 | R = 0.09<br>P = 0.63  | R = -0.08<br>P = 0.69 | R = -0.24<br>P = 0.23 | R = 0.37<br>P = 0.06   | R = 0.21<br>P = 0.29 |
| <b>AML</b> | NK (%) | R = 0.01<br>P = 0.49  | R = 0.52<br>P = 0.18  | R = 0.13<br>P = 0.74  | R = -0.12<br>P = 0.76 | R = -0.17<br>P = 0.66  | N/A                  |

No statistically significant correlations were identified by ANOVA F test for the investigated parameters.

**Table S5. Distribution of NK cells maturation subsets in NBM, MDS and AML groups**

| ME (mean) ± SE (standard error)                          | NBM           | MDS           | AML           |
|----------------------------------------------------------|---------------|---------------|---------------|
| % CD56 <sup>bright</sup> CD94 <sup>hi</sup> CD16-CD57-   | 9.7 ± 1.0%    | 13.34 ± 2.45% | 15.9 ± 5.86%  |
| % CD56 <sup>dim</sup> CD94 <sup>med</sup> CD16+CD57-     | 55.13 ± 3.41% | 46.05 ± 3.36% | 46.42 ± 8.2%  |
| % CD56 <sup>dim</sup> CD94 <sup>med/low</sup> CD16+CD57+ | 35.04 ± 3.78% | 40.58 ± 4.13% | 37.65 ± 9.05% |

An increase in NK percentages was observed as maturation shifted from the immature to the mature compartment, with a subsequent decrease as the hypermature state is reached, although still in higher percentages than in the immature subpopulation.

**Table S6. Percentage of positive NK cells for NKG2A (CD159a) and KIR inhibitory receptors detected in bone marrow microenvironment from NBM, MDS and AML settings**

|                                                                             | CD159a       | CD158a       | CD158b       | CD158e1     |
|-----------------------------------------------------------------------------|--------------|--------------|--------------|-------------|
| <b>CD56<sup>bright</sup>CD94<sup>hi</sup>CD16-CD57-<br/>(Percentages)</b>   |              |              |              |             |
| NBM                                                                         | 7.4% ± 0.9%  | 0.1% ± 0.1%  | 0.4% ± 0.1%  | 0.2% ± 0.1% |
| MDS                                                                         | 10.7% ± 2.2% | 0.3% ± 0.1%  | 1.3% ± 0.6%  | 0.1% ± 0.1% |
| AML                                                                         | 12.5% ± 4.4% | 1.3% ± 0.1%  | 0.4% ± 0.2%  | 0.4% ± 0.3% |
| <b>CD56<sup>dim</sup>CD94<sup>med</sup>CD16+CD57-<br/>(Percentages)</b>     |              |              |              |             |
| NBM                                                                         | 28.1 ± 2.7%  | 9.8% ± 1.8%  | 9.7% ± 1.2%  | 4.9% ± 1.1% |
| MDS                                                                         | 24.9% ± 3.2% | 7.1% ± 1.9%  | 6.1% ± 0.9%  | 3.2% ± 0.7% |
| AML                                                                         | 27.4% ± 4.3% | 9.8% ± 3.8%  | 9.6% ± 3.3%  | 6.6% ± 3.3% |
| <b>CD56<sup>dim</sup>CD94<sup>med/low</sup>CD16+CD57+<br/>(Percentages)</b> |              |              |              |             |
| NBM                                                                         | 11.4% ± 1.3% | 10.3% ± 1.8% | 12.7% ± 1.6% | 5.1% ± 1.4% |
| MDS                                                                         | 13.9% ± 2.0% | 11.1% ± 2.0% | 12.9% ± 2.5% | 7.2% ± 1.7% |
| AML                                                                         | 16.7% ± 6.1% | 9.7% ± 5.1%  | 11.1% ± 3.4% | 6.2% ± 3.1% |

Values represent mean percentages ± SE (standard error) from each group of cases: normal bone marrow (NBM), myelodysplastic syndromes (MDS), acute myeloid leukemia (AML).
